# Supplementary material
Source: Springer Nature journal article supplement (https://www.springermedizin.de/resource/supplementary/13058_2014_3414_MOESM1_ESM.pdf/9704128)
Supplement: MOESM1 [file 9704128]

## Supplementary Table S2

### Peptide sequences identified by MALDI-TOF/TOF MS

| Protein identity | Accession | Theoretical pI/MW | Peptide mass         | Peptide sequence by MALDI-TOF-TOF |
|------------------|-----------|-------------------|----------------------|-----------------------------------|
| ApoA1            | P02647    | 5.27/28078.62     | <i>m/z</i> 704.3279  | K.ETEGLR.Q                        |
|                  |           |                   | <i>m/z</i> 732.3503  | K.DLEEVK.A                        |
|                  |           |                   | <i>m/z</i> 831.3713  | R.LAEYHAK.A                       |
|                  |           |                   | <i>m/z</i> 869.4779  | R.QKVEPLR.A                       |
|                  |           |                   | <i>m/z</i> 873.4126  | R.AELQEGAR.Q                      |
|                  |           |                   | <i>m/z</i> 896.4201  | K.LHELQEK.L                       |
|                  |           |                   | <i>m/z</i> 1008.5228 | R.ARAHVVDALR.T                    |
|                  |           |                   | <i>m/z</i> 1012.5083 | K.AKPALEDLR.Q                     |
|                  |           |                   | <i>m/z</i> 1031.4388 | K.LSPLGEEMR.D                     |
|                  |           |                   | <i>m/z</i> 1152.5613 | R.QKLHELQEK.L                     |
|                  |           |                   | <i>m/z</i> 1157.5508 | R.LEALKENGGAR.L                   |
|                  |           |                   | <i>m/z</i> 1215.5619 | K.ATEHLSTLSEK.A                   |
|                  |           |                   | <i>m/z</i> 1252.5560 | K.VQPYLDDFQK.K                    |
|                  |           |                   | <i>m/z</i> 1299.5087 | K.WQEEMELYR.Q                     |
|                  |           |                   | <i>m/z</i> 1301.5539 | R.THLAPYSDEL.R.Q                  |
|                  |           |                   | <i>m/z</i> 1307.5261 | K.ETEGLRQEMSK.D                   |
|                  |           |                   | <i>m/z</i> 1318.5744 | K.LSPLGEEMRDR.A                   |
|                  |           |                   | <i>m/z</i> 1323.5383 | K.ETEGLRQEMSK.D                   |
|                  |           |                   | <i>m/z</i> 1380.6466 | K.VQPYLDDFQKK.W                   |
|                  |           |                   | <i>m/z</i> 1400.6022 | R.DYVSQFEGSALGK.Q                 |
|                  |           |                   | <i>m/z</i> 1427.6592 | K.KWQEEMELYR.Q                    |
|                  |           |                   | <i>m/z</i> 1451.6726 | K.AKVQPYLDDFQK.K                  |
|                  |           |                   | <i>m/z</i> 1462.7777 | R.VKDLATVYVDV.LK.D                |
|                  |           |                   | <i>m/z</i> 1467.7623 | K.VEPLRAELQEGAR.Q                 |
|                  |           |                   | <i>m/z</i> 1585.7484 | R.THLAPYSDEL.RQR.L                |
|                  |           |                   | <i>m/z</i> 1815.7964 | K.DSGRDYVSQFEGSALGK.Q             |
|                  |           |                   | <i>m/z</i> 1881.8834 | K.LLDNWDSVTSTFSKLR.E              |
|                  |           |                   | <i>m/z</i> 1908.9398 | K.LHELQEKLSPLGEEMR.D              |
|                  |           |                   | <i>m/z</i> 2064.0144 | R.AHVVDALRTHLAPYSDEL.R.Q          |
|                  |           |                   | <i>m/z</i> 2202.2336 | K.LREQLGPVTQEFWDNLEK.E            |
|                  |           |                   | <i>m/z</i> 2209.0707 | K.QLNLKLLDNWDSVTSTFSK.L           |
|                  |           |                   | <i>m/z</i> 2224.3566 | K.AKPALEDLRQGLLPVLESFK.V          |
|                  |           |                   | <i>m/z</i> 2598.3533 | R.QGLLPVLESFKVSFLSALEEYTK.K       |
| Transthyretin    | P02766    | 5.31/13761.41     | <i>m/z</i> 1366.7393 | R.GSPAINNVAVHVFR.K                |
|                  |           |                   | <i>m/z</i> 2451.1833 | K.ALGISPFHEHAEVVFTANDSGPR.R       |
|                  |           |                   | <i>m/z</i> 2645.2229 | R.RYTIAALLSPYSTTAVVTNPK.E         |
| APOH             | P02749    | 8.34/38298.16     | <i>m/z</i> 1445.6384 | R.VCPFAGGILENGGAVR.Y              |
